# Supplementary material for: Defining acute Essex-Lopresti injuries is problematic and variable: a systematic review
Source: PubMed Central journal article supplement — EFORT Open Rev. 2022 Oct 26;7(10):727–33. doi: 10.1530/EOR-22-0066 (PMC9619391; doi:10.1530/eor-22-0066), 2022-10-26
Supplement: EOR-22-0066supplementary_table_1.pdf [file EOR-22-0066supplementary_table_1.pdf]

## APPENDIX 1. Search strategy

All searches were performed on October 1st 2020 and rerun on January 4<sup>th</sup> 2022. The results found below are based on the 2022 search. No filters were used.

### *PubMed*

| Search | Query                                                                                                                                                                                                                                                                                                                                                     | Results |
|--------|-----------------------------------------------------------------------------------------------------------------------------------------------------------------------------------------------------------------------------------------------------------------------------------------------------------------------------------------------------------|---------|
| #4     | Search: #1 OR #2 OR #3 Sort by: Most Recent                                                                                                                                                                                                                                                                                                               | 2,144   |
| #3     | Search: ("Interosseous Membrane"[Mesh] OR Interosseous membrane*[tiab] OR DRUJ[tiab] OR radioulnar[tiab] OR radial-ulnar[tiab] OR radio-ulnar[tiab] OR (longitudinal[tiab] AND (forearm[tiab] OR "Forearm"[Mesh]))) AND (injur*[tiab] OR disrupt*[tiab] OR dislocat*[tiab] OR luxat*[tiab] OR instability[tiab] OR dissociat*[tiab]) Sort by: Most Recent | 2,051   |
| #2     | Search: proximal radius migration[tiab] Sort by: Most Recent                                                                                                                                                                                                                                                                                              | 6       |
| #1     | Search: Essex Lopresti[tiab] Sort by: Most Recent                                                                                                                                                                                                                                                                                                         | 213     |

### *Embase/OVID*

| # | Searches                                                       | Results |
|---|----------------------------------------------------------------|---------|
| 1 | essex lopresti.tj,ab,kw.                                       | 241     |
| 2 | proximal radius migration.tj,ab,kw.                            | 7       |
| 3 | (exp interosseous membrane/ or (Interosseous membrane* or DRUJ | 1362    |

| # | Searches                                                                                                                                                                                                                     | Results |
|---|------------------------------------------------------------------------------------------------------------------------------------------------------------------------------------------------------------------------------|---------|
|   | or radioulnar or radial-ulnar or radio-ulnar).ti,ab,kw. or<br>(longitudinal.ti,ab,kw. and (exp forearm/ or forearm.ti,ab,kw.)) adj6<br>(injur* or disrupt* or dislocat* or luxat* or instability or<br>dissociat*).ti,ab,kw. |         |
| 4 | 1 or 2 or 3                                                                                                                                                                                                                  | 1501    |

**CINAHL/Ebsco**

| #   | Query                                                                                                                                                                      | Results |
|-----|----------------------------------------------------------------------------------------------------------------------------------------------------------------------------|---------|
| S11 | S1 OR S2 OR S10                                                                                                                                                            | 499     |
| S10 | S8 N5 S9                                                                                                                                                                   | 464     |
| S9  | TI(injur* or disrupt* or dislocat* or luxat* or instability or<br>dissociat*) OR AB (injur* or disrupt* or dislocat* or luxat* or<br>instability or dissociat*)            | 305,498 |
| S8  | S3 OR S4 OR S7                                                                                                                                                             | 949     |
| S7  | S5 AND S6                                                                                                                                                                  | 153     |
| S6  | MH "Forearm" OR TI forearm OR AB forearm                                                                                                                                   | 8,642   |
| S5  | TI longitudinal OR AB longitudinal                                                                                                                                         | 100,762 |
| S4  | TI (Interosseous membrane* or DRUJ or radioulnar or radial-ulnar<br>or radio-ulnar) OR AB (Interosseous membrane* or DRUJ or<br>radioulnar or radial-ulnar or radio-ulnar) | 811     |

| #  | Query                                                        | Results |
|----|--------------------------------------------------------------|---------|
| S3 | (MH "Interosseous Membrane")                                 | 9       |
| S2 | TI proximal radius migration OR AB proximal radius migration | 1       |
| S1 | TI essex lopresti OR AB essex lopresti                       | 70      |

***Cochrane Database of Systematic Reviews/Wiley & Cochrane Central Register of Controlled Trials/Wiley***

|     |                                                                                        |       |
|-----|----------------------------------------------------------------------------------------|-------|
| #1  | essex-lopresti:ti,ab,kw                                                                | 4     |
| #2  | proximal radius migration:ti,ab,kw                                                     | 2     |
| #3  | MeSH descriptor: [Interosseous Membrane] explode all trees                             | 0     |
| #4  | (interosseous membrane* OR DRUJ OR radioulnar OR radial ulnar OR radio ulnar):ti,ab,kw | 717   |
| #5  | longitudinal:ti,ab,kw                                                                  | 22319 |
| #6  | MeSH descriptor: [Forearm] explode all trees                                           | 1479  |
| #7  | forearm:ti,ab,kw                                                                       | 7462  |
| #8  | #6 OR #7                                                                               | 7462  |
| #9  | #8 AND #5                                                                              | 82    |
| #10 | #3 OR #4 OR #9                                                                         | 791   |
| #11 | (injur* or disrupt* or dislocat* or luxat* or instability or dissociat*):ti,ab,kw      | 83324 |

|     |                         |     |
|-----|-------------------------|-----|
| #1  | essex-lopresti:ti,ab,kw | 4   |
| #12 | #10 AND #11             | 158 |
| #13 | #1 OR #2 OR #12         | 162 |

***Web Of Science/Clarative***

*Core collection*

TOPIC: Essex Lopresti[tiab] OR proximal radius migration OR ((Interosseous membrane\* OR DRUJ OR radioulnar OR radial-ulnar OR radio-ulnar OR (longitudinal AND forearm)) AND (injur\* OR disrupt\* OR dislocat\* OR luxat\* OR instability OR dissociat\*))

| <b>Database</b>                         | <b>Before deduplication</b> | <b>After deduplication</b> |
|-----------------------------------------|-----------------------------|----------------------------|
| PubMed                                  | 2144                        | 2138                       |
| Embase                                  | 1501                        | 378                        |
| CINAHL                                  | 499                         | 41                         |
| Cochrane Database of Systematic Reviews | 1                           | 1                          |
| Cochrane Central                        | 161                         | 138                        |
| Web of Science                          | 1921                        | 490                        |
| <b>Total</b>                            | <b>6227</b>                 | <b>3186</b>                |
